# Supplementary material for: Identifying disease-specific genes based on their topological significance in protein networks
Source: Springer Nature journal article supplement (doi:10.1186/1752-0509-3-36), 2009-03-23
Supplement: Additional file 7 [file 1752-0509-3-36-S7.pdf]

## Convergence hubs

|                           |                                                             |                                                                                                         |                              |
|---------------------------|-------------------------------------------------------------|---------------------------------------------------------------------------------------------------------|------------------------------|
| MGMT                      | Skin Diseases<br>Skin and Connective Tissue Diseases        | Breast Neoplasms<br>Carcinoma                                                                           | Breast Diseases              |
| ITIH4                     | Neoplasms<br>Urogenital Diseases                            | Neoplasms by Site<br>Skin and Connective Tissue Diseases                                                | Urogenital Neoplasms         |
| RAR-alpha/RXR-alpha       | Skin Diseases<br>Digestive System Neoplasms                 | Digestive System Diseases<br>Skin and Connective Tissue Diseases<br>Skin and Connective Tissue Diseases | Gastrointestinal Neoplasms   |
| Coagulation factor XII    | Skin Diseases<br>Neoplasms by Site                          | Breast Neoplasms<br>Digestive System Neoplasms                                                          | Digestive System Neoplasms   |
| YY1                       | Neoplasms by Site<br>Digestive System Diseases              | Digestive System Neoplasms<br>Breast Neoplasms                                                          | Urogenital Neoplasms         |
| NFKBIA                    | Virus Diseases<br>Intestinal Diseases                       | Digestive System Diseases<br>Skin Diseases<br>Skin and Connective Tissue Diseases                       | Hemic and Lymphatic Diseases |
| KNG                       | Pathologic Processes<br>Urogenital Diseases                 | Female Genital Diseases and Pregnancy Complications                                                     | Digestive System Diseases    |
| B2 bradykinin receptor    | Digestive System Neoplasms<br>Digestive System Diseases     | Skin Diseases<br>Skin and Connective Tissue Diseases                                                    | Gastrointestinal Neoplasms   |
| EMAPII                    | Virus Diseases<br>Gastrointestinal Diseases                 | Digestive System Diseases<br>Carcinoma                                                                  | Intestinal Diseases          |
| HNF4-alpha                | Genital Neoplasms, Male<br>Genital Diseases, Male           | Prostatic Neoplasms<br>Hepatitis B                                                                      | Prostatic Diseases           |
| 26S proteasome (20S core) | Neoplasms<br>Skin and Connective Tissue Diseases            | Skin Diseases<br>Digestive System Diseases                                                              | Neoplasms by Site            |
| NF-kB1 (p105)             | Skin and Connective Tissue Diseases<br>Urogenital Neoplasms | Skin Diseases<br>Genital Diseases, Female                                                               | Urogenital Diseases          |
| p53                       | Gastrointestinal Neoplasms<br>Colorectal Neoplasms          | Digestive System Neoplasms<br>Rectal Diseases<br>Respiratory Tract Diseases                             | Gastrointestinal Diseases    |
| TRPA1                     | Signs and Symptoms, Respiratory<br>Lung Diseases            | Urogenital Diseases                                                                                     | Pathologic Processes         |
| Thrombospondin 1          | Pathologic Processes<br>Skin and Connective Tissue Diseases | Pathological Conditions, Signs and Symptoms<br>Breast Neoplasms                                         | Skin Diseases                |

|           |                                                      |                                         |                 |
|-----------|------------------------------------------------------|-----------------------------------------|-----------------|
| ROR-alpha | Skin Diseases<br>Skin and Connective Tissue Diseases | Breast Neoplasms<br>Neoplasm Metastasis | Breast Diseases |
|-----------|------------------------------------------------------|-----------------------------------------|-----------------|

|         |                                      |                                                                                            |                      |
|---------|--------------------------------------|--------------------------------------------------------------------------------------------|----------------------|
| Trypsin | Urogenital Diseases<br>Skin Diseases | Female Genital Diseases and Pregnancy Complications<br>Skin and Connective Tissue Diseases | Urogenital Neoplasms |
|---------|--------------------------------------|--------------------------------------------------------------------------------------------|----------------------|

|      |                                             |                                                            |                       |
|------|---------------------------------------------|------------------------------------------------------------|-----------------------|
| NFIC | Pathologic Processes<br>Pancreatic Diseases | Pathological Conditions, Signs and Symptoms<br>Embryo Loss | Carcinoma, Renal Cell |
|------|---------------------------------------------|------------------------------------------------------------|-----------------------|

|             |                                                                           |                                                                                                  |                                     |
|-------------|---------------------------------------------------------------------------|--------------------------------------------------------------------------------------------------|-------------------------------------|
| IL-1 beta   | Pathologic Processes                                                      | Skin Diseases                                                                                    | Skin and Connective Tissue Diseases |
| Cathepsin G | Pathological Conditions, Signs and Symptoms<br>Neoplasms<br>Skin Diseases | Digestive System Diseases<br>Skin and Connective Tissue Diseases<br>Neoplasms by Histologic Type | Neoplasms by Site                   |

### Divergence hubs

|      |                            |                   |              |
|------|----------------------------|-------------------|--------------|
| IL-6 | Inappropriate ADH Syndrome | Hypopigmentation  | Pancreatitis |
|      | Retinal Artery Occlusion   | Craniopharyngioma |              |

|      |                                     |                                       |           |
|------|-------------------------------------|---------------------------------------|-----------|
| IRF8 | Adenocarcinoma<br>Neoplasms by Site | illness<br>Digestive System Neoplasms | Carcinoma |
|------|-------------------------------------|---------------------------------------|-----------|

|      |                                                  |                                       |                               |
|------|--------------------------------------------------|---------------------------------------|-------------------------------|
| IRF2 | Genital Neoplasms, Female<br>Neoplasm Metastasis | Adnexal Diseases<br>Ovarian Neoplasms | Epstein-Barr Virus Infections |
|------|--------------------------------------------------|---------------------------------------|-------------------------------|

|           |                                   |                                                                             |                                     |
|-----------|-----------------------------------|-----------------------------------------------------------------------------|-------------------------------------|
| STAT1     | Skin Diseases<br>Breast Neoplasms | Neoplasms by Site<br>Breast Diseases<br>Skin and Connective Tissue Diseases | Skin and Connective Tissue Diseases |
| IFN-gamma | Skin Diseases<br>Breast Diseases  | Adnexal Diseases                                                            | Breast Neoplasms                    |

|       |                                                  |                                                   |                           |
|-------|--------------------------------------------------|---------------------------------------------------|---------------------------|
| PSMA2 | Carcinoma<br>Neoplasms, Glandular and Epithelial | Carcinoma, Small Cell<br>Carcinoma, Squamous Cell | Carcinoma, Neuroendocrine |
|-------|--------------------------------------------------|---------------------------------------------------|---------------------------|

|           |                                                                |                                                      |                           |
|-----------|----------------------------------------------------------------|------------------------------------------------------|---------------------------|
| TNF-alpha | Tuberous Sclerosis                                             | Cardiomegaly                                         | Hamartoma                 |
| IRF9      | Schizophrenia, Paranoid<br>Pancreatitis<br>Pancreatic Diseases | Schizophrenia<br>Lipodystrophy<br>Multiple Sclerosis | Digestive System Diseases |

|       |                           |                    |                           |
|-------|---------------------------|--------------------|---------------------------|
| STAT2 | Digestive System Diseases | Dermatitis, Atopic | Skin Diseases, Eczematous |
|-------|---------------------------|--------------------|---------------------------|

|       |                                                                  |                                                                    |          |
|-------|------------------------------------------------------------------|--------------------------------------------------------------------|----------|
| c-Jun | Dermatitis<br>Alcoholic Neuropathy<br>Menkes Kinky Hair Syndrome | Carcinoma, Ductal, Breast<br>Skin Diseases<br>Colorectal Neoplasms | Flushing |
|-------|------------------------------------------------------------------|--------------------------------------------------------------------|----------|

|      |                           |                           |           |
|------|---------------------------|---------------------------|-----------|
| IRF1 |                           | Digestive System          |           |
|      | Digestive System Diseases | Neoplasms                 | Neoplasms |
|      | Skin Diseases             | Hemorrhagic Fevers, Viral |           |

Is drug target

Is drug target and related to skin diseases

Related to skin diseases, not a known target
